# Supplementary material for: Antioxidant Characterization of Six Tomato Cultivars and Derived Products Destined for Human Consumption
Source: MDPI journal article supplement (doi:10.3390/antiox12030761), 2023-03-21
Supplement: s1 [file s1]

**Table S1.** Antioxidant capacity by ABTS and DPPH assays in whole fresh tomato and puree.

| Cultivar                   | ABTS                                                                      |                                         | DPPH                                                                      |                                         |
|----------------------------|---------------------------------------------------------------------------|-----------------------------------------|---------------------------------------------------------------------------|-----------------------------------------|
|                            | Fresh tomato<br>(soluble + fat-soluble)<br>( $\mu\text{M}/100\text{ g}$ ) | Puree<br>( $\mu\text{M}/100\text{ g}$ ) | Fresh tomato<br>(soluble + fat-soluble)<br>( $\mu\text{M}/100\text{ g}$ ) | Puree<br>( $\mu\text{M}/100\text{ g}$ ) |
| <i>Cherry tomato</i>       | 269 $\pm$ 7.2 <sup>a</sup>                                                | 323 $\pm$ 7.5 <sup>b</sup>              | 260 $\pm$ 12.3 <sup>a</sup>                                               | 318 $\pm$ 7.6 <sup>b</sup>              |
| <i>Smooth round tomato</i> | 188 $\pm$ 6.9 <sup>a</sup>                                                | 242 $\pm$ 7.1 <sup>b</sup>              | 181 $\pm$ 8.9 <sup>a</sup>                                                | 236 $\pm$ 8.1 <sup>b</sup>              |
| <i>Round tomato sauce</i>  | 187 $\pm$ 6.8 <sup>a</sup>                                                | 238 $\pm$ 7.0 <sup>b</sup>              | 179 $\pm$ 10.0 <sup>a</sup>                                               | 232 $\pm$ 6.7 <sup>b</sup>              |
| <i>Datterino tomato</i>    | 221 $\pm$ 7.5 <sup>a</sup>                                                | 274 $\pm$ 8.3 <sup>b</sup>              | 216 $\pm$ 7.0 <sup>a</sup>                                                | 268 $\pm$ 6.2 <sup>b</sup>              |
| <i>S. Marzano tomato</i>   | 181 $\pm$ 6.7 <sup>a</sup>                                                | 228 $\pm$ 6.8 <sup>b</sup>              | 174 $\pm$ 8.3 <sup>a</sup>                                                | 221 $\pm$ 8.7 <sup>b</sup>              |
| <i>Piccadilly tomato</i>   | 154 $\pm$ 6.1 <sup>a</sup>                                                | 201 $\pm$ 6.3 <sup>b</sup>              | 148 $\pm$ 7.8 <sup>a</sup>                                                | 196 $\pm$ 6.0 <sup>b</sup>              |

Values represent mean  $\pm$  standard deviation. Results were analyzed by one-way analysis of variance ANOVA followed by Holm-Sidak's multiple comparisons test. Data followed by similar letters in the same line are not significantly different for  $p < 0.05$ .
